# Supplementary material
Source: PubMed Central journal article supplement (PMC10119139)
Supplement: 41541_2023_652_MOESM1_ESM.pdf [file 41541_2023_652_MOESM1_ESM.pdf]

## Supplementary material

**Supplementary Table 1: Demographic and clinical characteristics of the 27 healthcare workers included in the study.**

|                                                                                                                           | Delta-BA.1 co-infection (n=9) | BA.1 Infection (n=9) | COVID-19-naïve individuals (n=9) |
|---------------------------------------------------------------------------------------------------------------------------|-------------------------------|----------------------|----------------------------------|
| Female, n (%)                                                                                                             | 3 (33)                        | 6 (66)               | 6 (66)                           |
| Age at blood sampling, years, median [IQR]                                                                                | 32 [23-40]                    | 49 [29-54]           | 51 [48-64]                       |
| Interval between last immunization <sup>1</sup> and blood sampling for humoral immunity investigation, days, median [IQR] | 203 [197-212]                 | 193 [208-166]        | 179 [178-183]                    |
| Comorbidities, n (%)                                                                                                      | 1 (11)                        | 1 (11)               | 6 (66)                           |
| - hypertension                                                                                                            | 0                             | 0                    | 1 (11)                           |
| - diabetes                                                                                                                | 0                             | 0                    | 1 (11)                           |
| - hypothyroidism                                                                                                          | 0                             | 0                    | 1 (11)                           |
| - vascular disease                                                                                                        | 0                             | 1 (11)               | 0                                |
| - chronic lung disease                                                                                                    | 1 (11)                        | 0                    | 2 (22)                           |
| - heterozygous sickle cell disease                                                                                        | 0                             | 0                    | 1 (11)                           |
| Vaccination scheme, n (%)                                                                                                 |                               |                      |                                  |
| - 3 injections of BNT162b2 <sup>2</sup>                                                                                   | 2 (22)                        | 3 (33)               | 9 (100)                          |
| - 2 injections of BNT162b2                                                                                                | 6 (66)                        | 6 (66)               | 0                                |
| - 1 injection of BNT162b2                                                                                                 | 1 (11)                        | 0                    | 0                                |
| Previous infection, n (%)                                                                                                 | 2 (22)                        | 2 (22)               | 0                                |

IQR: interquartile range.

<sup>1</sup> Last immunization corresponds to the infection for both groups with a breakthrough infection and the third vaccine injection for the COVID-19-naïve fully vaccinated group.

<sup>2</sup> BNT162b2 corresponds to the Pfizer-BioNTech monovalent SARS-CoV-2 vaccine.

**Supplementary Table 2. Individual characteristics of the 27 healthcare workers included into the study.**

| Subject                              | Last immunization <sup>1</sup>                     | Age at blood sampling, years | Sex    | Immunization scheme                                          | Date of first vaccine injection | Date of second vaccine injection | Date of third vaccine injection | Date of previous infection | Date of breakthrough infection diagnosis | Date of blood sampling for humoral investigation | Delay last immunization <sup>1</sup> - blood sampling for humoral investigation, days |
|--------------------------------------|----------------------------------------------------|------------------------------|--------|--------------------------------------------------------------|---------------------------------|----------------------------------|---------------------------------|----------------------------|------------------------------------------|--------------------------------------------------|---------------------------------------------------------------------------------------|
| <b>Delta-BA.1 co-infection (n=9)</b> |                                                    |                              |        |                                                              |                                 |                                  |                                 |                            |                                          |                                                  |                                                                                       |
| Subject-1                            | Simultaneous Delta and BA.1 breakthrough infection | 26                           | Male   | 2 injections of BNT162b2                                     | 07/27/2021                      | 08/18/2021                       | -                               | -                          | 12/20/2021                               | 07/23/2022                                       | 215                                                                                   |
| Subject-2                            | Simultaneous Delta and BA.1 breakthrough infection | 20                           | Male   | 2 injections of BNT162b2                                     | 06/2021                         | 07/28/2021                       | -                               | -                          | 12/27/2021                               | 07/22/2022                                       | 207                                                                                   |
| Subject-3                            | Simultaneous Delta and BA.1 breakthrough infection | 43                           | Female | 3 injections of BNT162b2                                     | 03/2021                         | 04/08/2021                       | 12/01/2021                      | -                          | 12/27/2021                               | 07/25/2022                                       | 210                                                                                   |
| Subject-4                            | Simultaneous Delta and BA.1 breakthrough infection | 49                           | Male   | 3 injections of BNT162b2                                     | 06/2021                         | 07/12/2021                       | 12/12/2021                      | -                          | 12/27/2021                               | 08/01/2022                                       | 217                                                                                   |
| Subject-5                            | Simultaneous Delta and BA.1 breakthrough infection | 38                           | Male   | 2 injections of BNT162b2                                     | 08/18/2021                      | 09/2021                          | -                               | -                          | 12/31/2021                               | 07/21/2022                                       | 202                                                                                   |
| Subject-6                            | Simultaneous Delta and BA.1 breakthrough infection | 18                           | Female | 2 injections of BNT162b2                                     | 09/2021                         | 10/07/2021                       | -                               | -                          | 01/03/2022                               | 07/25/2022                                       | 203                                                                                   |
| Subject-7                            | Simultaneous Delta and BA.1 breakthrough infection | 26                           | Female | 2 injections of BNT162b2 and previous breakthrough infection | 06/2021                         | 07/2021                          | -                               | 12/16/2021                 | 01/04/2022                               | 07/21/2022                                       | 198                                                                                   |
| Subject-8                            | Simultaneous Delta and BA.1 breakthrough infection | 35                           | Male   | 2 injections of BNT162b2                                     | 07/2021                         | 07/22/2021                       | -                               | -                          | 01/17/2022                               | 07/23/2022                                       | 187                                                                                   |
| Subject-9                            | Simultaneous Delta and BA.1 breakthrough infection | 32                           | Male   | Previous infection followed by 1 injection of BNT162b2       | 07/07/2021                      | -                                | -                               | 11/2020                    | 01/18/2022                               | 08/03/2022                                       | 197                                                                                   |
| <b>BA.1 infection (n=9)</b>          |                                                    |                              |        |                                                              |                                 |                                  |                                 |                            |                                          |                                                  |                                                                                       |
| Subject-1                            | BA.1 breakthrough infection                        | 58                           | Male   | 3 injections of BNT162b2                                     | 09/01/2020                      | 02/01/2021                       | 10/14/2021                      | -                          | 01/16/2022                               | 06/21/2022                                       | 156                                                                                   |
| Subject-2                            | BA.1 breakthrough infection                        | 26                           | Male   | 2 injections of BNT162b2                                     | 01/16/2021                      | 02/25/2021                       | -                               | -                          | 12/18/2021                               | 07/21/2022                                       | 215                                                                                   |
| Subject-3                            | BA.1 breakthrough infection                        | 33                           | Male   | 2 injections of BNT162b2                                     | 12/01/2020                      | 02/08/2021                       | -                               | -                          | 12/19/2021                               | 06/30/2022                                       | 193                                                                                   |
| Subject-4                            | BA.1 breakthrough infection                        | 49                           | Female | 2 injections of BNT162b2 and previous breakthrough infection | 06/01/2021                      | 07/01/2021                       | -                               | 10/01/2021                 | 01/03/2022                               | 06/23/2022                                       | 171                                                                                   |
| Subject-5                            | BA.1 breakthrough infection                        | 25                           | Female | 3 injections of BNT162b2                                     | 01/22/2021                      | 02/22/2021                       | 11/24/2021                      | -                          | 01/24/2022                               | 08/04/2022                                       | 192                                                                                   |
| Subject-6                            | BA.1 breakthrough infection                        | 54                           | Female | 3 injections of BNT162b2                                     | 06/01/2021                      | 07/01/2021                       | 10/01/2021                      | -                          | 01/18/2022                               | 08/22/2022                                       | 216                                                                                   |
| Subject-7                            | BA.1 breakthrough infection                        | 54                           | Female | 2 injections of BNT162b2                                     | 09/15/2021                      | 10/15/2021                       | -                               | -                          | 01/16/2022                               | 07/28/2022                                       | 193                                                                                   |
| Subject-8                            | BA.1 breakthrough infection                        | 51                           | Female | 2 injections of BNT162b2                                     | 07/16/2021                      | 08/17/2021                       | -                               | -                          | 01/16/2022                               | 08/05/2022                                       | 201                                                                                   |

|                                         |                             |    |        |                                                         |            |            |            |            |            |            |     |
|-----------------------------------------|-----------------------------|----|--------|---------------------------------------------------------|------------|------------|------------|------------|------------|------------|-----|
| Subject-9                               | BA.1 breakthrough infection | 35 | Female | Previous infection followed by 2 injections of BNT162b2 | 04/01/2021 | 11/01/2021 | -          | 03/01/2020 | 01/23/2022 | 07/04/2022 | 162 |
| <b>COVID-19-naïve individuals (n=9)</b> |                             |    |        |                                                         |            |            |            |            |            |            |     |
| Subject-1                               | Third injection of BNT162b2 | 49 | Female | 3 injections of BNT162b2                                | 01/20/2021 | 02/26/2021 | 10/29/2021 | -          | -          | 04/26/2022 | 179 |
| Subject-2                               | Third injection of BNT162b2 | 51 | Female | 3 injections of BNT162b2                                | 01/20/2021 | 02/22/2021 | 11/29/2021 | -          | -          | 05/30/2022 | 182 |
| Subject-3                               | Third injection of BNT162b2 | 77 | Male   | 3 injections of BNT162b2                                | 01/20/2021 | 02/17/2021 | 11/25/2021 | -          | -          | 05/23/2022 | 179 |
| Subject-4                               | Third injection of BNT162b2 | 67 | Female | 3 injections of BNT162b2                                | 01/21/2021 | 02/18/2021 | 09/14/2021 | -          | -          | 03/21/2022 | 188 |
| Subject-5                               | Third injection of BNT162b2 | 58 | Female | 3 injections of BNT162b2                                | 01/21/2021 | 02/19/2021 | 11/19/2021 | -          | -          | 05/17/2022 | 179 |
| Subject-6                               | Third injection of BNT162b2 | 62 | Female | 3 injections of BNT162b2                                | 01/22/2021 | 02/26/2021 | 11/19/2021 | -          | -          | 05/16/2022 | 178 |
| Subject-7                               | Third injection of BNT162b2 | 50 | Male   | 3 injections of BNT162b2                                | 01/25/2021 | 02/22/2021 | 11/19/2021 | -          | -          | 05/12/2022 | 174 |
| Subject-8                               | Third injection of BNT162b2 | 48 | Female | 3 injections of BNT162b2                                | 02/01/2021 | 02/22/2021 | 10/22/2021 | -          | -          | 04/21/2022 | 181 |
| Subject-9                               | Third injection of BNT162b2 | 38 | Male   | 3 injections of BNT162b2                                | 01/26/2021 | 02/16/2021 | 11/27/2021 | -          | -          | 05/31/2022 | 185 |

<sup>1</sup> Last immunization corresponds to the infection for both groups with a breakthrough infection and the third vaccine injection for the COVID-19-naïve fully vaccinated group.

**Supplementary Table 3. Results of the serological tests in the three groups of participants.**

| Group                                  | Test                            | GMT <sup>1</sup> (95% CI) <sup>2</sup> | GMT ratio |        |        |
|----------------------------------------|---------------------------------|----------------------------------------|-----------|--------|--------|
|                                        |                                 |                                        | 1 vs 2    | 1 vs 3 | 2 vs 3 |
| <b>Anti-RBD IgG (BAU/mL)</b>           |                                 |                                        |           |        |        |
| 1                                      | Delta-BA.1 co-infected          | 1771 (813-3855)                        |           |        |        |
| 2                                      | BA.1 infected                   | 2220 (1336-3689)                       | 0.80      | 4.53   | 5.68   |
| 3                                      | COVID-19-naive fully vaccinated | 391 (230-664)                          |           |        |        |
| <b>Anti-S1 IgA (µg/mL)</b>             |                                 |                                        |           |        |        |
| 1                                      | Delta-BA.1 co-infected          | 0.47 (0.22-1.00)                       |           |        |        |
| 2                                      | BA.1 infected                   | 0.62 (0.44-0.88)                       | 0.77      | 9.00   | 11.76  |
| 3                                      | COVID-19-naive fully vaccinated | 0.05 (0.03-0.10)                       |           |        |        |
| <b>Neutralizing antibodies (titer)</b> |                                 |                                        |           |        |        |
| <b>19A</b>                             |                                 |                                        |           |        |        |
| 1                                      | Delta-BA.1 co-infected          | 1010 (472-2162)                        |           |        |        |
| 2                                      | BA.1 infected                   | 1194 (625-2280)                        | 0.85      | 8.92   | 10.55  |
| 3                                      | COVID-19-naive fully vaccinated | 113 (54-240)                           |           |        |        |
| <b>Delta</b>                           |                                 |                                        |           |        |        |
| 1                                      | Delta-BA.1 co-infected          | 563 (260-1221)                         |           |        |        |
| 2                                      | BA.1 infected                   | 855 (579-1262)                         | 0.66      | 9.76   | 14.81  |
| 3                                      | COVID-19-naive fully vaccinated | 58 (30-109)                            |           |        |        |
| <b>BA.1</b>                            |                                 |                                        |           |        |        |
| 1                                      | Delta-BA.1 co-infected          | 198 (100-392)                          |           |        |        |
| 2                                      | BA.1 infected                   | 318 (166-612)                          | 0.62      | 12.87  | 20.70  |
| 3                                      | COVID-19-naive fully vaccinated | 15 (10-25)                             |           |        |        |
| <b>BA.4</b>                            |                                 |                                        |           |        |        |
| 1                                      | Delta-BA.1 co-infected          | 80 (61-104)                            |           |        |        |
| 2                                      | BA.1 infected                   | 186 (117-294)                          | 0.43      | 6.31   | 14.73  |
| 3                                      | COVID-19-naive fully vaccinated | 13 (9-18)                              |           |        |        |
| <b>BA.5</b>                            |                                 |                                        |           |        |        |
| 1                                      | Delta-BA.1 co-infected          | 132 (68-256)                           |           |        |        |
| 2                                      | BA.1 infected                   | 174 (136-223)                          | 0.76      | 10.02  | 13.21  |
| 3                                      | COVID-19-naive fully vaccinated | 13 (9-18)                              |           |        |        |

<sup>1</sup> GMT: Geometric mean titer

<sup>2</sup> 95% CI: 95% confidence interval

NB: GMT results were rounded to the unit for the first and the third parameters tested and to two digits after unit for the second one. GMT ratios were rounded to two digits after the unit for all parameters.

### Supplementary Data:

Since demographical parameters were not similar between the three groups we performed a multiple linear regression to assess the impact of the two adjustment variables, i) delay between last immunization and blood sampling and ii) age at blood sampling, on the humoral response described. This analysis highlights that these variables could not solely explain the lack of significant difference observed in the humoral response between individuals with a Delta-BA.1 co-infection and those with a BA.1 infection or the significant difference observed between both of these groups with the COVID-19-naïve fully vaccinated group.

|                                                                                                 | <b>Anti-RBD IgG levels (BAU/mL)</b> | <b>Anti-S1 IgA (µg/mL)</b> | <b>PRNT<sub>50</sub>-19A</b> | <b>PRNT<sub>50</sub>-Delta</b> | <b>PRNT<sub>50</sub>-BA.1</b> | <b>PRNT<sub>50</sub>-BA.4</b> | <b>PRNT<sub>50</sub>-BA.5</b> |
|-------------------------------------------------------------------------------------------------|-------------------------------------|----------------------------|------------------------------|--------------------------------|-------------------------------|-------------------------------|-------------------------------|
| <b>Delay between last immunization<sup>1</sup> and blood sampling for humoral investigation</b> | p-value= 0.4159                     | p-value= 0.4459            | p-value=0.0412               | p-value=0.9511                 | p-value=0.7228                | p-value=0.3340                | p-value=0.8880                |
| <b>Age at blood sampling</b>                                                                    | p-value=0.6509                      | p-value=0.8831             | p-value=0.3221               | p-value=0.9040                 | p-value=0.9775                | p-value=0.9641                | p-value=0.9028                |

<sup>1</sup> Last immunization corresponds to the infection for both groups with a breakthrough infection and the third vaccine injection for the COVID-19-naïve fully vaccinated group.

**Supplementary Flow Chart:** Flow chart detailing the inclusion process of the 9 Delta-BA.1 co-infected individuals.

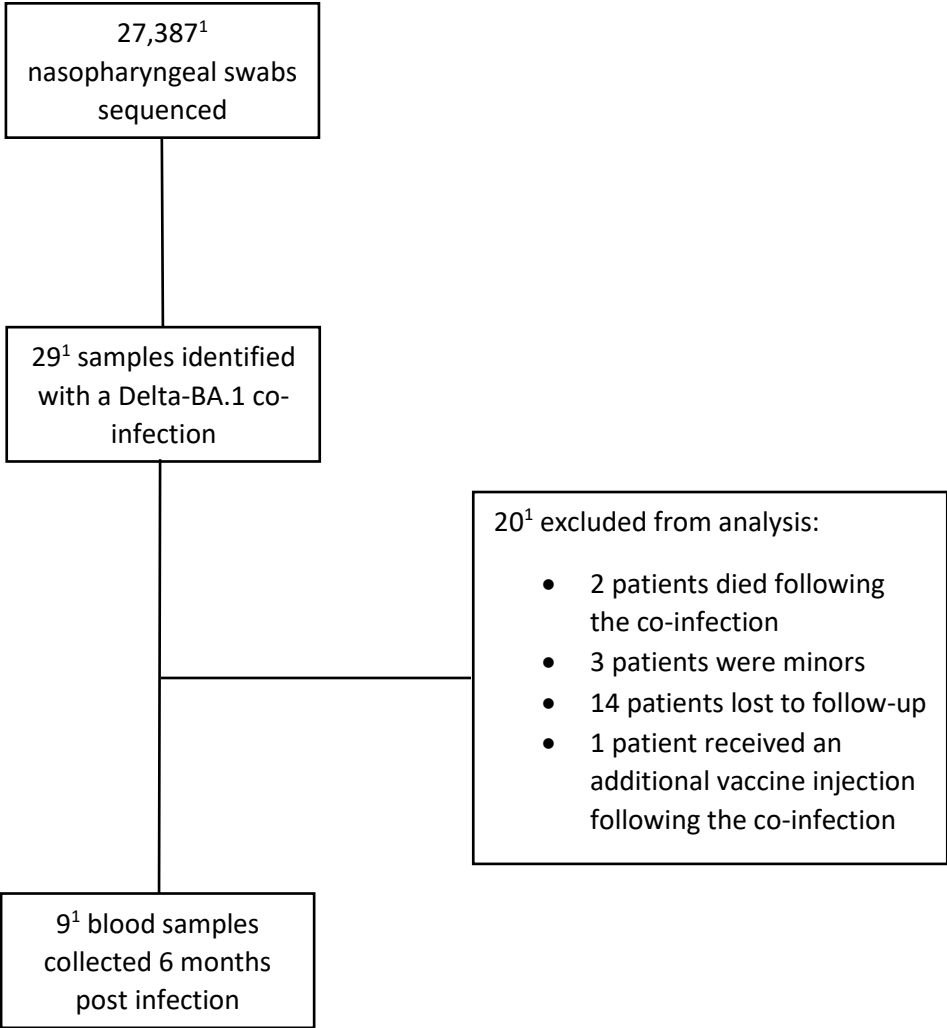

<sup>1</sup> Patients were first included in the *Bal A et al., Nat Commun, 2022<sup>6</sup>*, study where researchers identified 29 cases of Delta-BA.1 co-infections
